# Supplementary material
Source: PubMed Central journal article supplement (PMC6325297)

## **Supplemental Figures.**

**Supplemental Figure 1.** (A) ED<sub>50</sub> values of DLBCL cell lines reported (apoptosis measured by flow cytometry) after 24 hour treatment with TAK-243 (B) SU-DHL10 cells were treated with TAK-243. Compound was washed out at the indicated timepoints and cells were cultured for a total of 24 hours. Apoptosis was then assessed by Annexin V staining. The data are mean±SE. \*, p<0.05, \*\*, p<0.01 compared to untreated control. (C) DLBCL cell lines were treated with TAK-243 for 4 hours. Proteins were lysed and subjected to immunoblotting.

**Supplemental Figure 2.** (A) U-2932 and OCI-LY3 cells were engineered to express shMYC or vector control. Cells were treated with 100 nM TAK-243 for 24 hours, and apoptosis was assessed by Annexin V staining. Data are the mean±SE. \* - p<0.05. (B) DLBCL cells were treated with SKT and TAK-243 for 24 hours. Apoptosis was assessed by Annexin V staining.

# Supplemental Figure 1

**A**

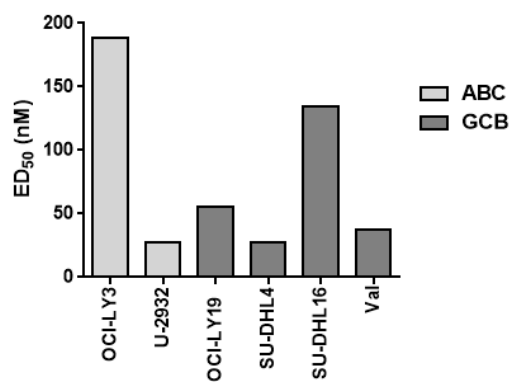

**B**

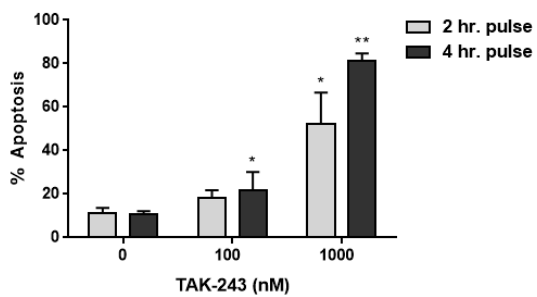

**C**

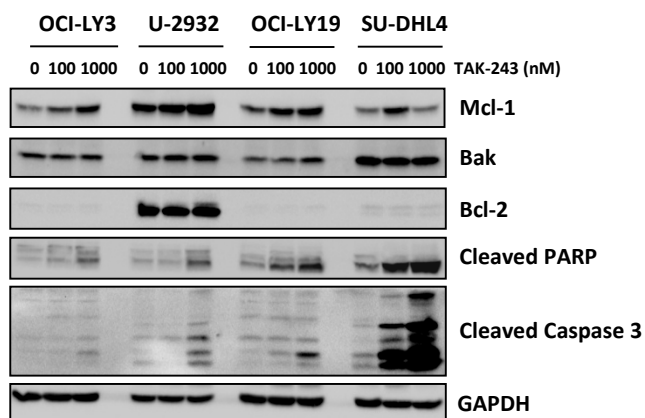

## Supplemental Figure 2

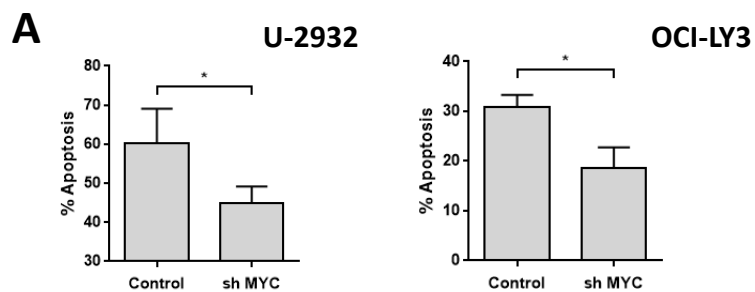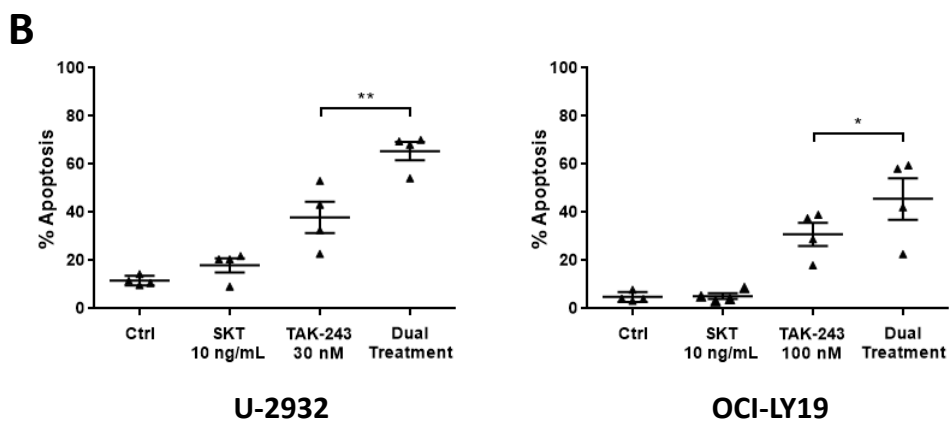

Supplement: ba026880-suppl1.pdf [file ba026880-suppl1.pdf]
